# Supplementary material for: Production of functional eggs and sperm from in vitro-expanded type A spermatogonia in rainbow trout
Source: PubMed Central journal article supplement (PMC7296041; doi:10.1038/s42003-020-1025-y), 2020-06-15
Supplement: 42003_2020_1025_MOESM1_ESM.pdf [file 42003_2020_1025_MOESM1_ESM.pdf]

**Supplementary table 1.** Components of cell culture medium.

| Medium name                                        | L15        | MEM $\alpha$ | hESC              | StemPro-34        | MSC                     | NSC               | TS-3              |
|----------------------------------------------------|------------|--------------|-------------------|-------------------|-------------------------|-------------------|-------------------|
| Basal medium                                       | L15        | MEM $\alpha$ | DMEM/F12+GlutaMAX | StemPro-34<br>SFM | MSC SFM Basal<br>Medium | KnockOUT DMEM/F12 | DMEM/F12+GlutaMAX |
| HEPES (25 mM)                                      | + (pH 7.8) | -            | -                 | -                 | -                       | -                 | -                 |
| Fetal bovine serum (%)                             | 2          | 2            | 2                 | 2                 | 2                       | 2                 | 10                |
| Bovine serum albumin (%)                           | 0.5        | 0.5          | 1.8               | 0.5               | 0.5                     | 0.5               | 1.8               |
| L-aspartic acid (20 $\mu$ g/ml)                    | +          | +            | +                 | +                 | +                       | +                 | -                 |
| L-cystin (20 $\mu$ g/ml)                           | +          | +            | +                 | +                 | +                       | +                 | -                 |
| L-prolin (20 $\mu$ g/ml)                           | +          | +            | +                 | +                 | +                       | +                 | -                 |
| L-glutamic acid (20 $\mu$ g/ml)                    | +          | +            | +                 | +                 | +                       | +                 | -                 |
| Ascorbic acid (50 $\mu$ M)                         | +          | +            | +                 | +                 | +                       | +                 | +                 |
| Salmonids serum (0.25%)                            | +          | +            | +                 | +                 | +                       | +                 | -                 |
| Rainbow trout blood plasma (1%)                    | -          | -            | -                 | -                 | -                       | -                 | +                 |
| 2-Mercaptoethanol ( $\mu$ M)                       | 50         | 50           | 55                | 50                | 50                      | 50                | 55                |
| human bFGF (ng/ml)                                 | 1          | 1            | 8                 | 1                 | 1                       | 1                 | 8                 |
| Rainbow trout embryonic extract<br>(1 $\mu$ g/ml)  | +          | +            | +                 | +                 | +                       | +                 | -                 |
| Chemically Defined Lipid Concentrate<br>(0.1%)     | +          | +            | +                 | +                 | +                       | +                 | +                 |
| Z-VAD-FMK (40 $\mu$ M)                             | -          | -            | -                 | -                 | -                       | -                 | +                 |
| Progesterone (100pg/ ml)                           | -          | -            | -                 | -                 | -                       | -                 | +                 |
| Penicillin (50 U/ml)                               | +          | +            | +                 | +                 | +                       | +                 | +                 |
| Ampicillin (50 $\mu$ g/ml)                         | +          | +            | +                 | +                 | +                       | +                 | +                 |
| Streptomycin (50 $\mu$ g/ml)                       | +          | +            | +                 | +                 | +                       | +                 | +                 |
| Stempro <sup>®</sup> hESC SFM Growth<br>Supplement | -          | -            | +                 | -                 | -                       | -                 | +                 |
| Stempro <sup>®</sup> MSC SFM Supplement            | -          | -            | -                 | -                 | +                       | -                 | -                 |
| StemPro-34 Nutrient Supplement                     | -          | -            | -                 | +                 | -                       | -                 | -                 |
| StemPro Neural Supplement                          | -          | -            | -                 | -                 | -                       | +                 | -                 |

**Supplementary table 2.** Primer sequences used for PCRs.

| <b>Primer name</b> | <b>Primer sequence</b>            |
|--------------------|-----------------------------------|
| <b>inhibinP-FW</b> | 5'-TGAAAAGCTTAGTATTTGGTGAACAACA   |
| <b>inhibinP-RV</b> | 5'-TGAAGGATCCCCAGTCTGCATGGTTCAGAT |
| <b>vasa-FW</b>     | 5'-TCTTCAGAGAGATGGGGCAAGTCATC     |
| <b>vasa-RV</b>     | 5'-TCCCATATCCAGGACCACACGCACATT    |
| <b>dnd1-FW</b>     | 5'-AGATGTGGCTGCAGGAGACT           |
| <b>dnd1-RV</b>     | 5'-GTTTCATCATGAGGCGGAACT          |
| <b>nanos2-FW</b>   | 5'-GAATTCGATCGGGACTGAGA           |
| <b>nanos2-RV</b>   | 5'-CAGAATGGGGCAGATGACTT           |
| <b>hsd3b-FW</b>    | 5'-TTGGACTGGGCCATGTCTCT           |
| <b>hsd3b-RV</b>    | 5'-ATGCTGCTGGTGTAGATGAAGGA        |
| <b>fshr-FW</b>     | 5'-TGAAGCCATTCTGGACACTT           |
| <b>fshr-RV</b>     | 5'-TGTTAGCACAATGGCAGTGA           |
| <b>sox9b-FW</b>    | 5'-AGAGGTCAGCCCTTAGCACA           |
| <b>sox9b-RV</b>    | 5'-GAGCCGTTGTTCCCAAGATA           |
| <b>arb-FW</b>      | 5'-TACTGTCACCGAAACCTTGGA          |
| <b>arb-RV</b>      | 5'-TGGTTGTGCAGGCAGAATTGGA         |
| <b>clu-FW</b>      | 5'-AAAGCCTTCCGGTATGACCT           |
| <b>clu-RV</b>      | 5'-TCAAACCTCCTCAGCTGCTT           |
| <b>actb-FW</b>     | 5'-ACTACCTGATGAAGATCCTG           |
| <b>actb-RV</b>     | 5'-TTGCTGATCCACATCTGTTG           |

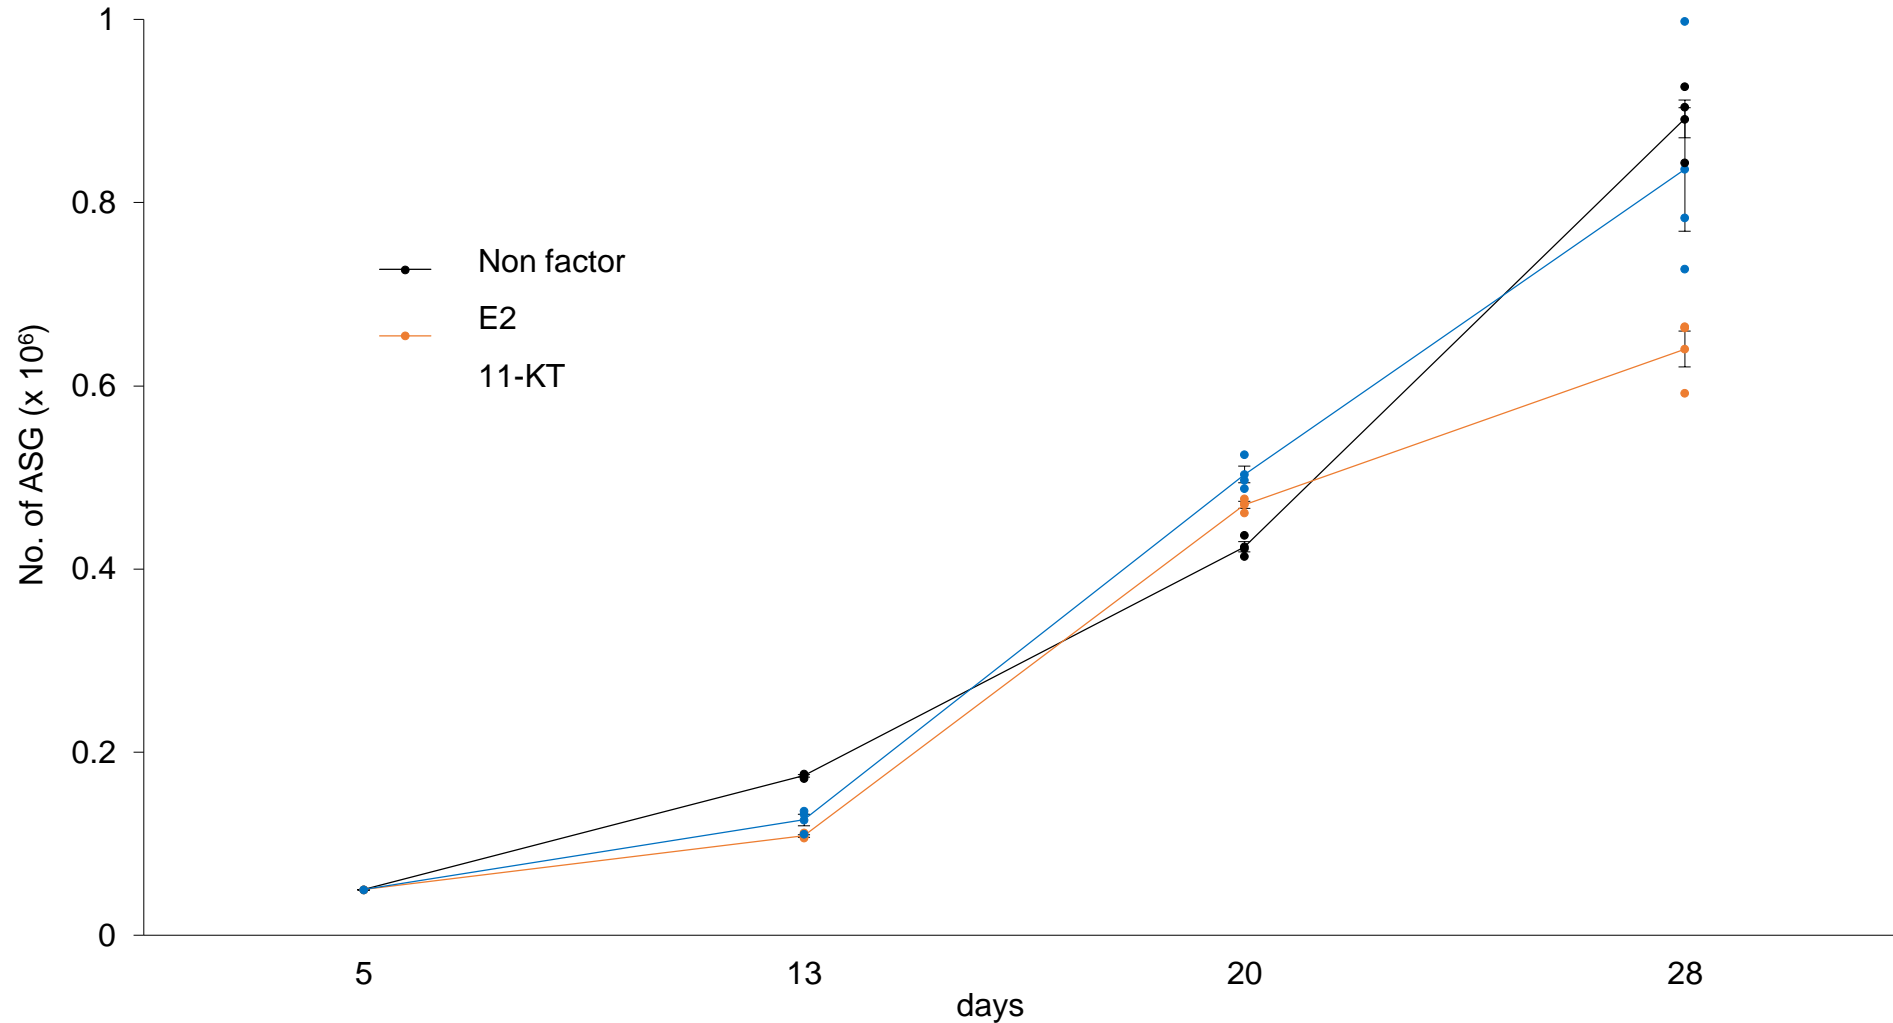

**Supplementary figure 1. Effect of sex steroids on the number of ASGs.**

Effect of 11-ketotestosterone (1,000 pg/ml) and estradiol-17 $\beta$  (100 pg/ml) in the presence of a TSC feeder layer in human embryonic stem cell medium supplemented with 10% FBS and 1% trout blood plasma on the number of ASGs. Data are shown as the mean  $\pm$  SEM (n=3).
