# Supplementary material for: Production of functional eggs and sperm from in vitro-expanded type A spermatogonia in rainbow trout
Source: PubMed Central journal article supplement (PMC7296041; doi:10.1038/s42003-020-1025-y), 2020-06-15
Supplement: 42003_2020_1025_MOESM2_ESM.pdf [file 42003_2020_1025_MOESM2_ESM.pdf]

## Description of Additional Supplementary Files

**File Name: Supplementary Data 1**

**Description:** Source data for graphs

**File Name: Supplementary Data 2**

**Description:** Source data for gels
